# Supplementary material for: Integrated multiomics reveals gut microbiota-protein-metabolite alterations that regulate adverse events and responses to radio-chemo-immunotherapy in microsatellite stable rectal cancer: a prospective longitudinal study
Source: Research Square preprint supplement (doi:10.21203/rs.3.rs-6133863/v1), 2025-03-11
Supplement: Supplementary file 3 [file 8fcd7cfd0f520aa8e3f1cba0.docx]

# Sample preparation and bacterial enrichment

500 μL of phosphate buffered saline (PBS) pre-chilled at 4 oC was added to the fecal samples along with quartz sand to ensure thorough mixing. The mixture was then centrifuged at 4 oC for 5 minutes to collect the supernatant, which enriched the bacterial content.

# Protein extraction and proteome sample preparation

Bacterial cells were lysed by adding 250 μL of lysis buffer containing sodium dodecyl sulfate (SDS) and tris(hydroxymethyl)aminomethane hydrochloride (Tris-HCl, pH 8.0), and subjected to high-temperature lysis at 95 oC with 800 rpm agitation in a constant temperature metal bath for 10 minutes. To further disrupt the cells, the samples were subjected to ultrasonication for 1 hour at 10 oC with a power setting of 40 KHz. Post-lysis, proteins were precipitated by adding 1 mL of acetone to the bacterial lysate and incubating overnight at -20 oC, followed by centrifugation. After centrifugation, the supernatant was discarded, and the protein pellet was washed 3 times with 400 μL of acetone. The pellet was then resuspended in 25 μL of lysis buffer (8 M urea) and subjected to denaturation at 31.5 oC with 600 rpm mixing for 30 minutes. Reduction was achieved by adding 2.3 μL of 0.1 M tris(2-carboxyethyl)phosphine (TCEP), which was dissolved in 100 mM ammonium bicarbonate (ABB). Alkylation was then performed in 6 μL of 0.2 M iodoacetamide (IAA), also dissolved in 100 mM ABB, in the dark at 31.5 oC with 600 rpm mixing for 45 minutes. Next, 100 μL of 0.1 M ABB was added to each tube, followed by 1.5 μg trypsin protease solution, incubating at 32 oC with 600 rpm agitation for 4 hours. Trypsin digestion was performed by adding 1.5 μg of trypsin to each sample and incubating at 32 oC with 600 rpm agitation for 12 hours. The digestion process was terminated by adding 18 μL of 10% trifluoroacetic acid (TFA). Finally, the digested peptides were desalted using SOLAμTM SPE Plate (Thermo Fisher Scientific™, San Jose, USA) according to the user guides provided by the producer.

# Spectral library construction

Peptides from all samples were pooled into a single peptide sample with a total amount of 100 μg for library construction. The pool sample was further fractionated with a Waters XBridge Peptide BEH C18 column (300 Å, 5 μm × 4.6 mm × 250 mm) under a DIONEX UltiMateTM 3000 Liquid Chromatography system. Mobile phase A was 10 mM ammonium hydroxide (pH 10), and mobile phase B was 98% acetonitrile (ACN) with 10 mM ammonium hydroxide (pH 10). Peptides were collected every one minute with a gradient from 5% to 35% ACN over 60 minutes at a flow rate of

0.5 mL/min, and then combined into 30 fractions. After drying with a SpeedVac, the 30 fraction samples were resuspended with 2% ACN, 0.1% formic acid (FA) and then sent for the following analysis. LC-MS/MS analysis was performed using an ultra-high pressure liquid chromatography (UHPLC) system (Bruker Daltonics, Germany) and a timsTOF Pro mass spectrometer (Bruker Daltonics, Germany), utilizing the data-dependent acquisition (DDA) mode. Buffer A. 100% H2O

containing 0.1% FA; Buffer B. 100% ACN in water containing 0.1% FA. All reagents were MS grade. For each acquisition, peptides were first loaded onto a pre-column (5 mm × 300 µm i.d.) at a pressure of 217.5 bar, then introduced into an analytical column (1.9 µm, 120 Å, 150 mm × 75 µm i.d.) at a flow rate of 300 nL/min, analyzed using a 60-minute LC gradient (0-50 min, 5-27%

mobile phase B; 50-60 min, 27-40% mobile phase B). Mass spectrometry scan parameters were as follows: PASEF MS and MS/MS mass scan range from 100-1700 m/z, 1/k0 scanning range from

0.6-1.6, with a peak detection threshold of 5000; PASEF MS/MS scan count set to 10, charge range from 0-5, peak detection threshold of 2500 cts/s.

# Proteome sample analysis

For the proteomic analysis, data-independent acquisition (DIA) was employed for all samples. A peptide solution of 0.2 μg/μL was prepared, with an injection volume set at 1 μL for each DIA

sample, resulting in a total loading amount of 200 ng. During DIA acquisition for all samples, peptides were first loaded onto a pre-column (5 mm × 300 µm i.d.) at a pressure of 217.5 bar, then introduced into an analytical column (1.9 µm, 120 Å, 150 mm × 75 µm i.d.) at a flow rate of 300 nL/min, analyzed using a 60-minute LC gradient (0-50 min, 5-27% mobile phase B; 50-60 min,

27-40% mobile phase B). The mass spectrometry scanning parameters were as follows: PASEF MS mass scan range from 100-1700 m/z, 1/k0 scanning range from 0.7-1.3, with a peak detection threshold of 5,000; PASEF MS/MS scan count set to 10, charge range from 0-5, peak detection threshold of 2,500 cts/s, with a total of 56 windows.

# Mass spectrometry data analysis

The construction of the spectral library utilized a combination of data-dependent acquisition (DDA) data and metagenomic data collected from the samples, with the latter providing the fasta file. The mass spectrometry data were processed using the DIA-NN software (version 1.8.1) for database searching, leveraging the spectral library generated as described above. This analysis yielded both qualitative and quantitative data, with a set threshold for the false discovery rate (FDR) of less than 0.01 serving as the filtering criterion.

# Statistical and bioinformatics analysis

Taxonomic annotations were performed using the peptide-centric taxonomic annotation software Unipept[1] (<https://unipept.ugent.be/mpa>), categorizing into seven hierarchical levels: kingdom, phylum, class, order, family, genus, and species. Proteins not detected in 80% of the samples were excluded, and the remaining missing values were imputed with zero.α-Diversity (Shannon index, Simpson index, Richness index) and β-Diversity (distance matrix-based unconstrained ordination methods such as PCA, PCoA, and adonis multivariate variance) analyses were conducted using R packages. Initially, the non-parametric Kruskal-Wallis rank-sum test was utilized to identify species with differential abundance across multiple groups (three or more), followed by pairwise comparisons between groups using the Wilcoxon rank-sum test for these species. Subsequently, Linear Discriminant Analysis Effect Size (LEfSe) was employed to estimate the contribution of each differentially abundant species to the overall variance, with species exhibiting an LDA score greater than 2 being selected by default. To explore the functionality of proteins, eggNOG- mapper[2] was used for Clusters of Orthologous Groups (COG) annotation, and GhostKOALA[3] was employed for KEGG Orthology (KO) annotation. Pathway enrichment significance analysis was performed using Fisher's exact test, with a P-value <0.05 considered statistically significant. The Wilcoxon test was applied for inter-group differential protein analysis, with proteins showing a fold change (fc) > 1.2 or fc < 1/1.2 and P < 0.05 considered as significantly different proteins.

# References

1. Gurdeep Singh R, Tanca A, Palomba A, Van der Jeugt F, Verschafelt P, Uzzau S, et al. Unipept 4.0: functional analysis of metaproteome data. J. Proteome Res. 2019;18(2):606–15. https://doi.org/10.1021/acs.jproteome. 8b00716.
2. Cantalapiedra CP, Hernandez-Plaza A, Letunic I, Bork P, Huerta-Cepas J. eggNOG-mapper v2: functional annotation, orthology assignments, and domain prediction at the metagenomic scale. Mol. Biol. Evol. 2021;38(12):5825–9. https://doi.org/10.1093/molbev/msab293.
3. Kanehisa M, Sato Y, Morishima K. BlastKOALA and GhostKOALA: KEGG tools for functional characterization of genome and metagenome sequences. J. Mol. Biol. 2016;428(4):726– 31. https://doi.org/10.1016/j.jmb. 2015.11.006.
