# Supplementary material for: Integrated multiomics reveals gut microbiota-protein-metabolite alterations that regulate adverse events and responses to radio-chemo-immunotherapy in microsatellite stable rectal cancer: a prospective longitudinal study
Source: Research Square preprint supplement (doi:10.21203/rs.3.rs-6133863/v1), 2025-03-11
Supplement: Supplementary file 4 [file c765efcb00f05012f68aa781.xlsx]

## Sheet: Sheet1
No	Gender(Female,male)	Age（≥60,<60）	cTstage pretreatment	cNstage pretreatment	pCR(no,yes)
1	1	1	3	2	0
2	1	0	4	2	0
3	0	0	4	1	0
4	1	1	3	2	0
5	0	1	4	2	0
6	0	0	3	1	1
7	0	1	2	1	1
8	1	0	4	1	1
9	1	0	2	2	1
10	1	1	4	1	0
11	1	0	4	2	0
12	0	0	3	0	1
13	0	1	2	1	1
14	1	1	4	0	0
15	1	1	2	1	1
16	0	1	4	1	1
17	0	1	3	1	0
18	1	0	4	2	0
19	1	1	2	2	0
20	1	1	2	2	0
21	1	0	3	1	1
22	1	1	4	1	0
23	0	0	4	2	0
24	0	0	4	0	0
25	0	1	2	1	1
26	0	1	4	1	1
27	0	0	3	0	0
28	0	1	3	1	0
29	1	1	3	1	1
30	1	0	3	1	0
31	0	1	3	0	0
32	1	0	3	0	0
33	0	0	3	1	0
34	1	0	4	0	0
35	1	1	2	1	0
