# Supplementary material for: Integrated multiomics reveals gut microbiota-protein-metabolite alterations that regulate adverse events and responses to radio-chemo-immunotherapy in microsatellite stable rectal cancer: a prospective longitudinal study
Source: Research Square preprint supplement (doi:10.21203/rs.3.rs-6133863/v1), 2025-03-11
Supplement: Supplementary file 5 [file ff9d1aedf20a4ea85d681486.docx]

#

MATERIALS AND METHODS

## Metagenome DNA Extraction and Shotgun Sequencing

Total microbial genomic DNA samples were extracted using the OMEGA Mag-Bind Soil DNA Kit (M5635-02) (Omega Bio-Tek, Norcross, GA, USA), following the manufacturer’s instructions, and stored at -20°C prior to further assessment. The quantity and quality of extracted DNAs were measured using a Qubit™ 4 Fluorometer, with WiFi: Q33238 (Qubit™ Assay Tubes: Q32856; Qubit ™ 1X dsDNA HS Assay Kit: Q33231) (Invitrogen, USA) and agarose gel electrophoresis, respectively. The extracted microbial DNA was processed to construct metagenome shotgun sequencing libraries with insert sizes of 400 bp by using

Illumina TruSeq Nano DNA LT Library Preparation Kit. Each library was sequenced by Illumina NovaSeq platform (Illumina, USA) with PE150 strategy at Metabo-Profile Biotechnology Co., Ltd. (Shanghai, China).

## Metagenomics Analysis

Raw sequencing reads were processed to obtain quality-filtered reads for further analysis. First, sequencing adapters were removed from sequencing reads using Cutadapt (v1.2.1) ([Martin 2011](#_bookmark5)). Secondly, low quality reads were trimmed using a sliding-window algorithm in fastp ([Chen, Zhou](#_bookmark3) et al. 2018). Thirdly, reads were aligned to the host genome of homo sapiens using BMTagger to remove host contamination (Rotmistrovsky and Agarwala 2011). Once quality-filtered reads were obtained ， taxonomical classifications of metagenomics sequencing reads from each sample were performed using [Kraken2 ([Wood, Lu et al. 2019](#_bookmark11)) against an RefSeq-derived database, which included genomes from archaea, bacteria, viruses, fungi, protozoans, metazoans and viridiplantae. Reads assigned to metazoans or viridiplantae were removed for downstream analysis] or [Kaiju (Menzel et al., 2016) with greedy-5 mode against an nr-derived database, which included proteins from archaea, bacteria, viruses, fungi and microbial eukaryotes]. Megahit (v1.1.2)([Liu, Chi-Man et al. 2015](#_bookmark4)) was used to assemble for each sample using the meta-large presetted parameters. The generated contigs (longer than 300bp) were then pooled together and clustered using mmseqs2 ([Steinegger and SöDing 2017](#_bookmark10)) with “easy-linclust” mode, setting sequence identity threshold to 0.95 and covered residuse of the shorter contig to 90%. The lowest common ancestor taxonomy of the non-redundant contigs was obtained by aligning them against the NCBI-nt database by mmseqs2 ([Steinegger and SöDing 2017](#_bookmark10)) with “taxonomy” mode, and contigs assigned to Viridiplantae or Metazoa were dropped in the following analysis. MetaGeneMark ([Zhu, Alexandre et al. 2010](#_bookmark12)) was used to predict the genes in the contigs. CDS sequences of all samples were clustered by mmseqs2 ([Steinegger and SöDing](#_bookmark10)

#

[2017](#_bookmark10)) with “easy-cluster” mode, setting protein sequence identity threshold to 0.90 and covered residuse of the shorter contig to 90%. To assess the abundances of these genes, the high-quality reads from each sample were mapped onto the predicted gene sequences using salmon ([Patro 2015](#_bookmark6)) in the quasi-mapping-based mode with “--meta --minScoreFraction=0.55 ”, and the CPM (copy per kilobase per million mapped reads) was used to normalize abundance values in metagenomes. The functionality of the non-redundant genes were obtained by annotated using mmseqs2 ([Steinegger and SöDing 2017](#_bookmark10)) with the “search” mode against the protein databases of KEGG, EggNOG and CAZy databases, respectively. EggNOG and GO were obtained using EggNOG-mapper (v2) ([Cantalapiedra, Hernández-Plaza et al. 2021](#_bookmark2)). GO ontology was obtained using map2slim ([www.metacpan.org](http://www.metacpan.org/)). KO were obtained using KOBAS ([Bu 2021](#_bookmark1)).

## Statistical Analyses

Based on the taxonomic and functional profiles of non-redundant genes, LEfSe (Linear discriminant analysis effect size) was performed to detect differentially abundant taxa and functions across groups using the default parameters ([Segata, Izard et al. 2011](#_bookmark9)). Beta diversity analysis was performed to investigate the compositional and functional variation of microbial communities across samples using Bray-Curtis distance metrics ([Bray and Curtis 1957](#_bookmark0)) and visualized via principal coordinate analysis (PCoA), nonmetric multidimensional scaling (NMDS) and unweighted pair-group method with arithmetic means (UPGMA) hierarchical clustering ([Ramette 2007](#_bookmark7)).

## Data Access

All raw sequences were deposited in the NCBI Sequence Read Archive under accession number.

## References

Bray, J. R. and J. T. Curtis (1957). "An Ordination of the Upland Forest Communities of Southern Wisconsin." Ecological Monographs **27**(4): 325-349.

Bu, D., Luo, H. , Huo, P. , Wang, Z. , Zhang, S. , & He, Z. , et al. (2021). "KOBAS-i:

intelligent prioritization and exploratory visualization of biological functions for gene enrichment analysis %J Nucleic Acids Research."

Cantalapiedra, C. P., A. Hernández-Plaza, I. Letunic, P. Bork and J. Huerta-Cepas (2021). "eggNOG-mapper v2: Functional Annotation, Orthology Assignments, and Domain Prediction at the Metagenomic Scale." 2021.2006.2003.446934.

Chen, S., Y. Zhou, Y. Chen and G. J. B. Jia (2018). "fastp: an ultra-fast all-in-one FASTQ preprocessor." **34**(17): i884-i890.

Liu, Chi-Man, Lam, Tak-Wah, Li, Dinghua, Luo, Ruibang, Sadakane and K. J. Bioinformatics (2015). "MEGAHIT: an ultra-fast single-node solution for large and complex metagenomics assembly via succinct de Bruijn graph."

Martin, M. (2011). "Cutadapt removes adapter sequences from high-throughput sequencing reads." EMBnet.journal; Vol 17, No 1: Next Generation Sequencing Data Analysis.

Patro, R. (2015). "Salmon: Accurate, Versatile and Ultrafast Quantification from RNA-seq Data using Lightweight-Alignment."

Ramette, A. (2007). "Multivariate analyses in microbial ecology." Fems Microbiology Ecology **62**(2): 142-160.

Rotmistrovsky, K. and R. Agarwala (2011). "BMTagger: Best Match Tagger for removing human reads from metagenomics datasets."

Segata, N., J. Izard, L. Waldron, D. Gevers, L. Miropolsky, W. S. Garrett and C. Huttenhower (2011). "Metagenomic biomarker discovery and explanation." Genome Biology **12**(6).

Steinegger, M. and J. J. N. B. SöDing (2017). "MMseqs2 enables sensitive protein sequence searching for the analysis of massive data sets."

Wood, D. E., J. Lu and B. J. G. b. Langmead (2019). "Improved metagenomic analysis with Kraken 2." **20**(1).

Zhu, W., L. Alexandre and B. J. N. A. R. Mark (2010). "Ab initio gene identification in metagenomic sequences." **38**(12): e132.
